# Supplementary material for: Master corepressor inactivation through multivalent SLiM-induced polymerization mediated by the oncogene suppressor RAI2
Source: PubMed Central journal article supplement (PMC11187106; doi:10.1038/s41467-024-49488-3), 2024-06-19

[1,232]

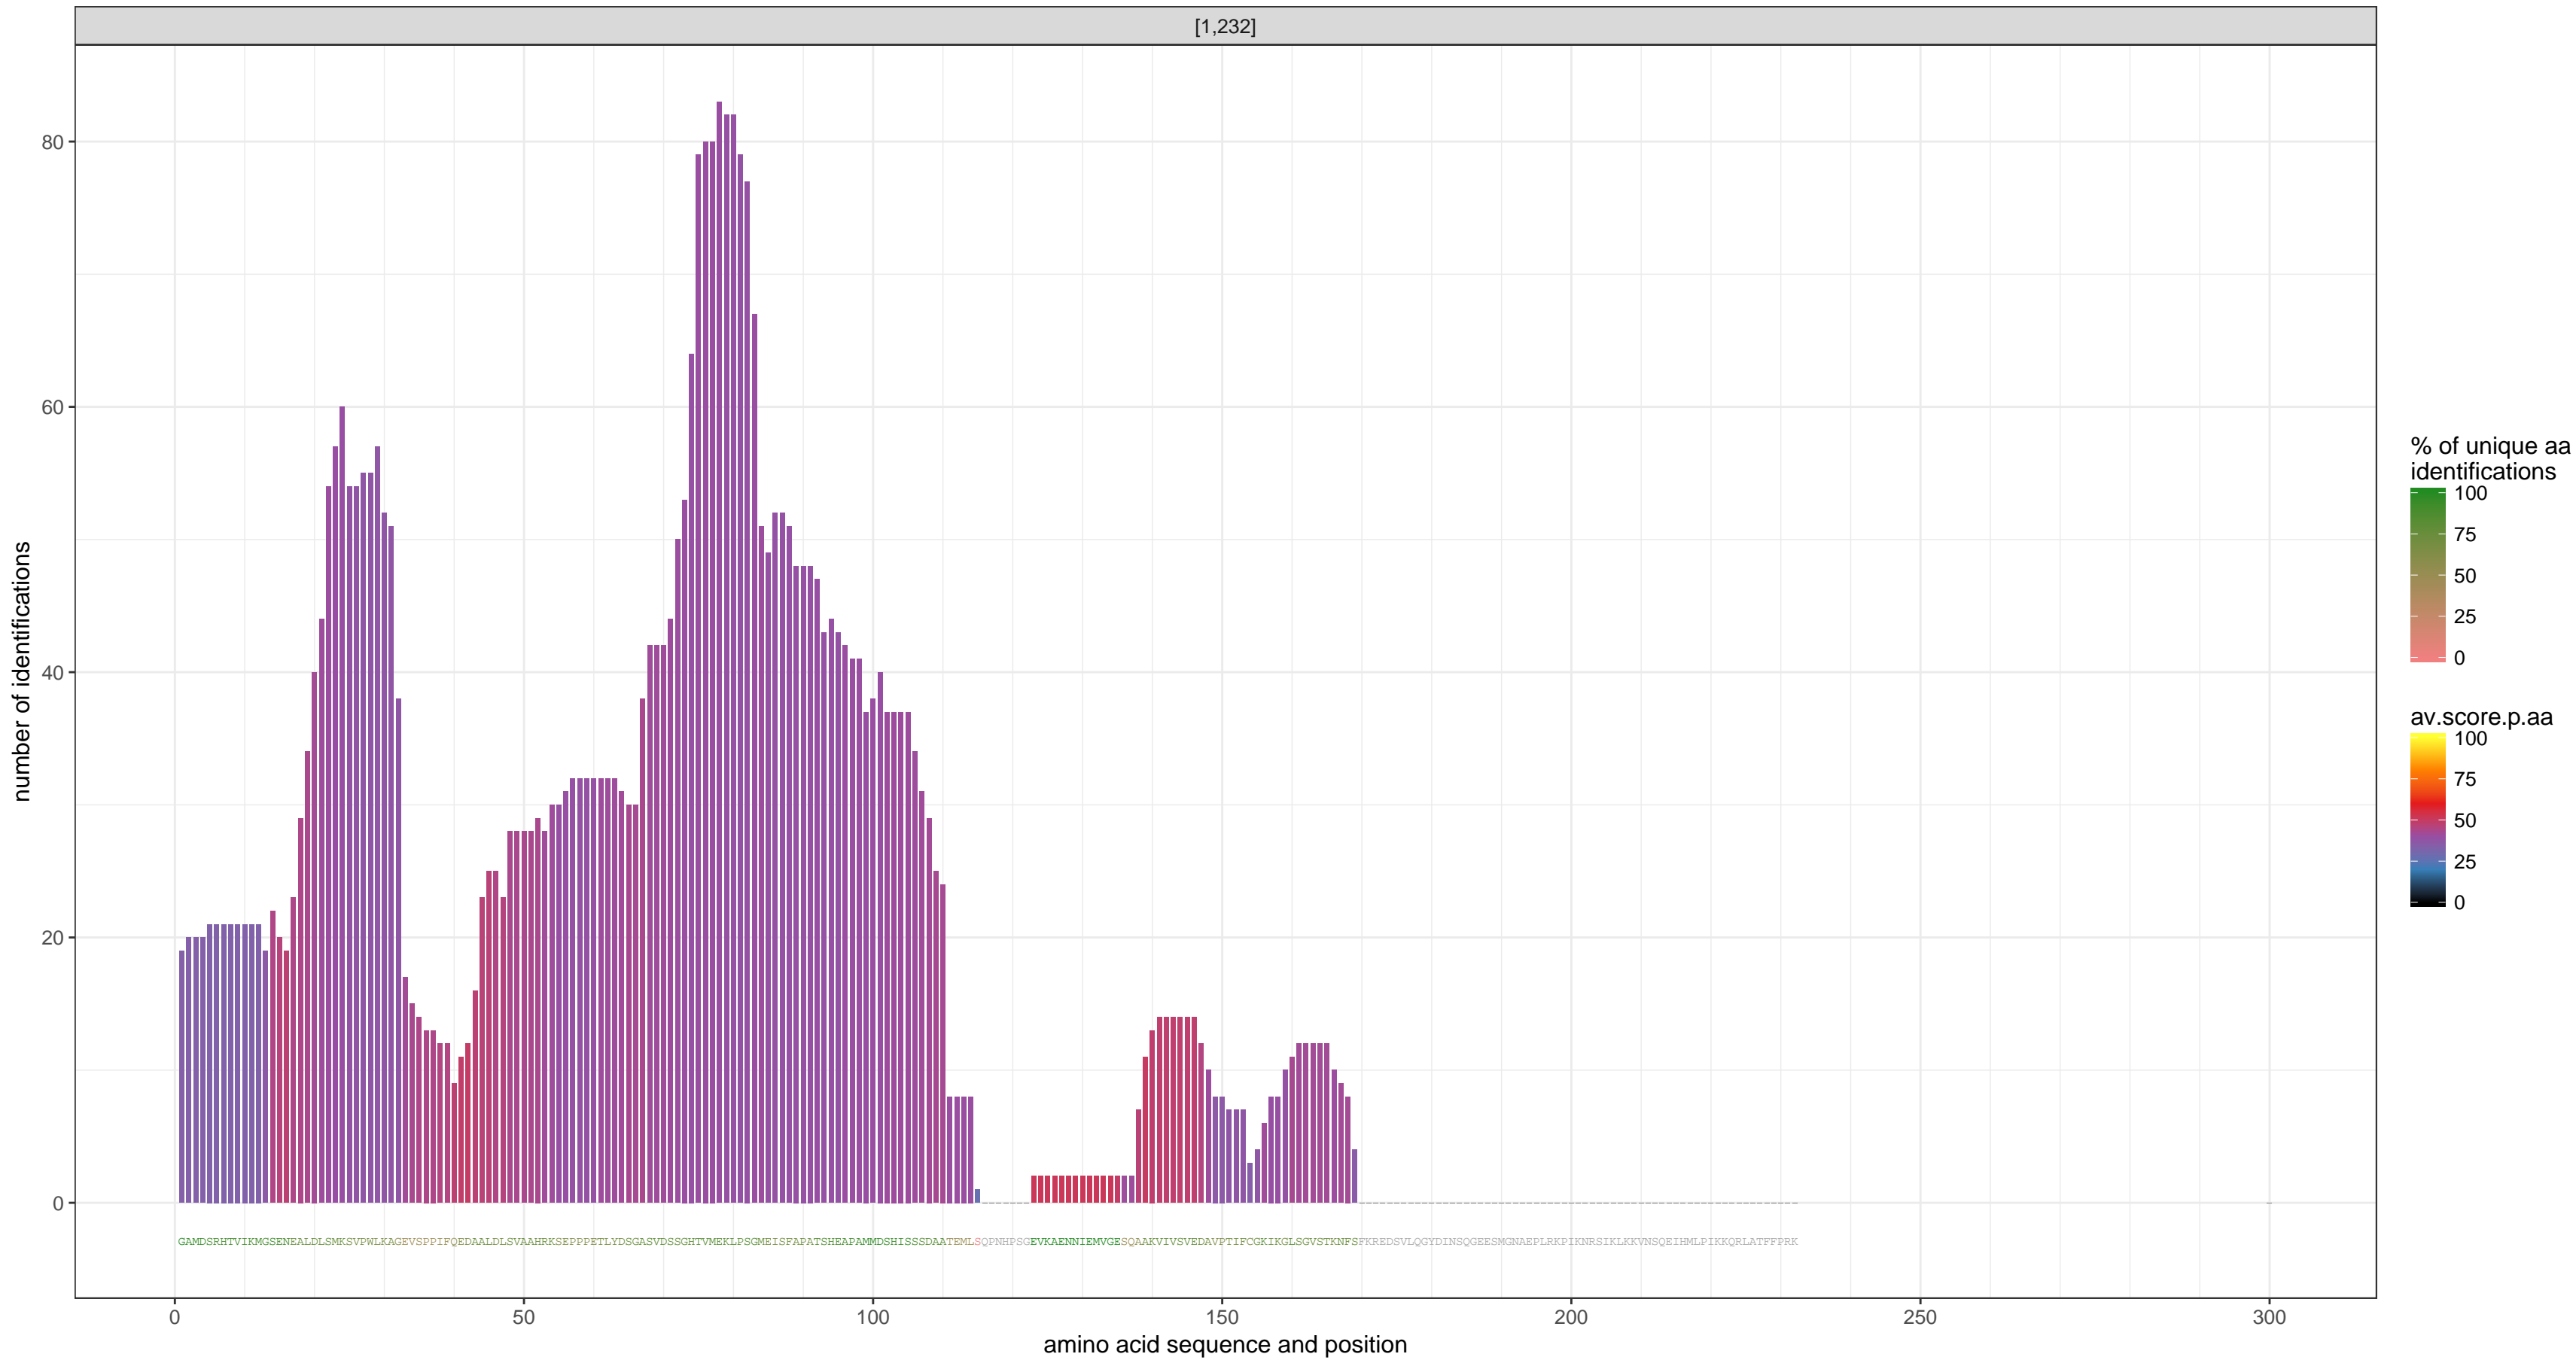

180222\_band02\_R1

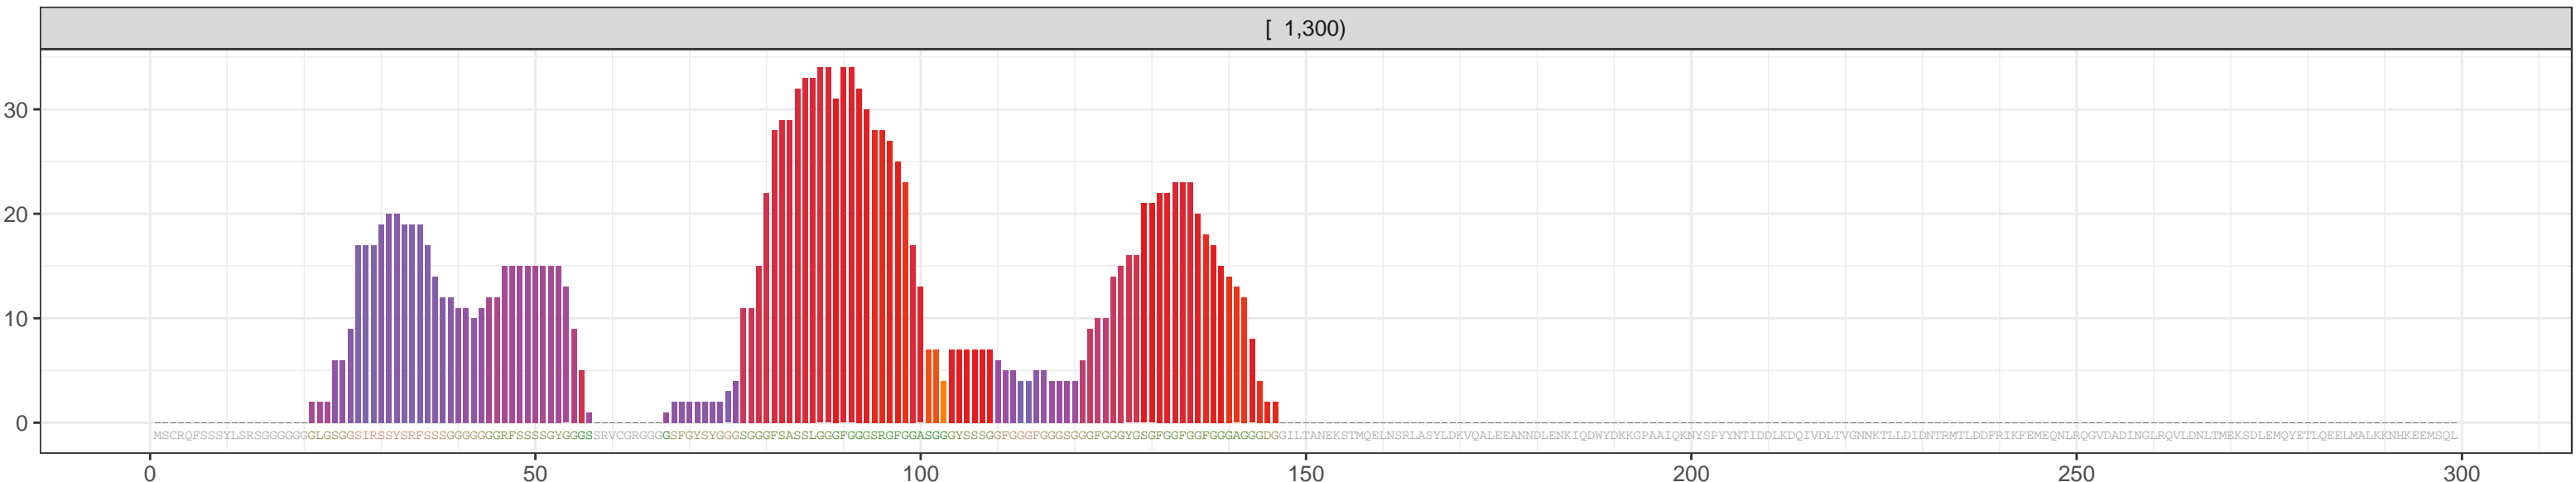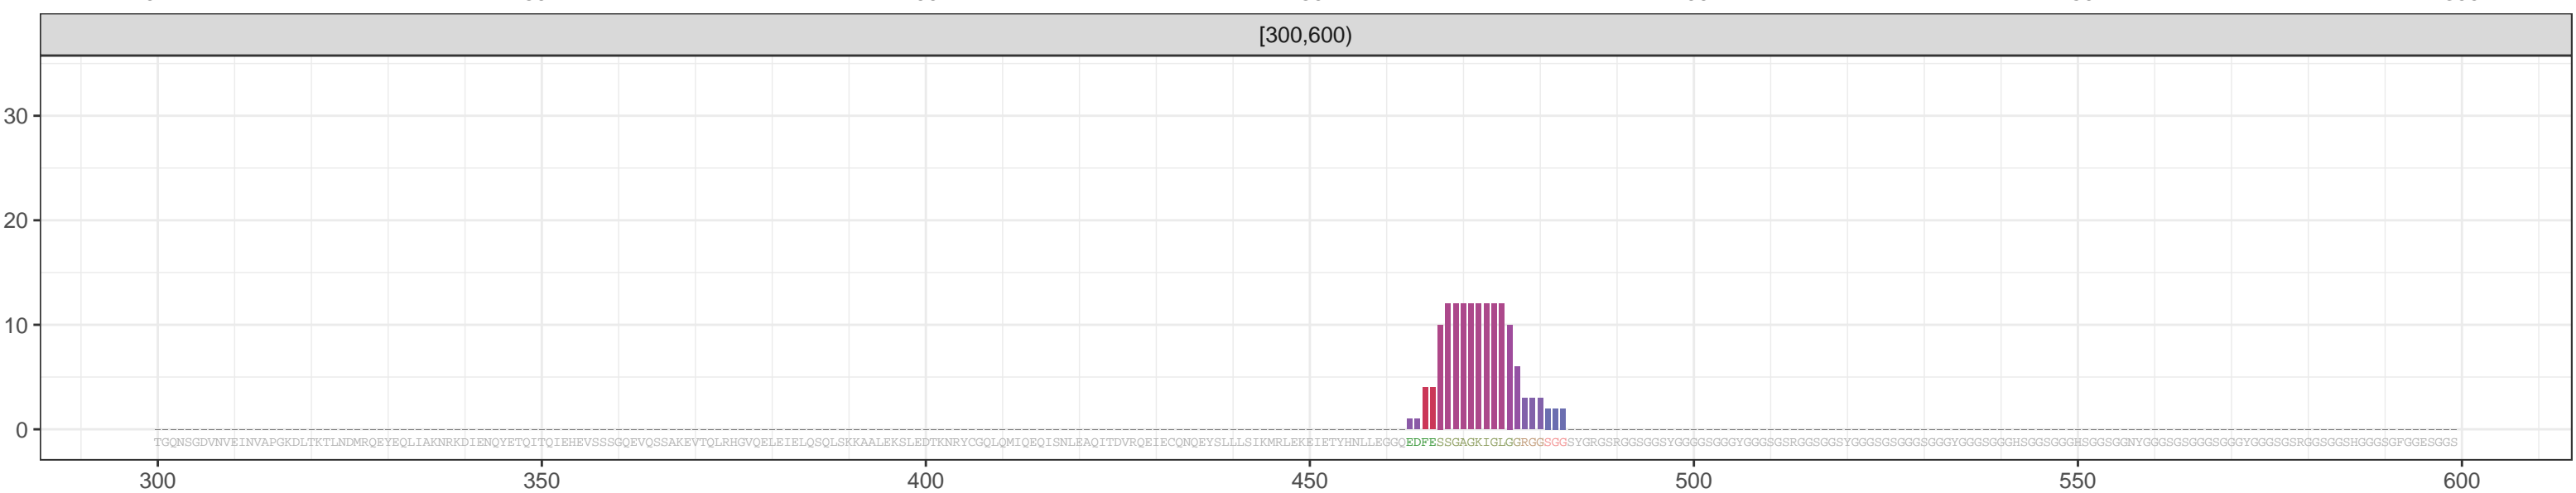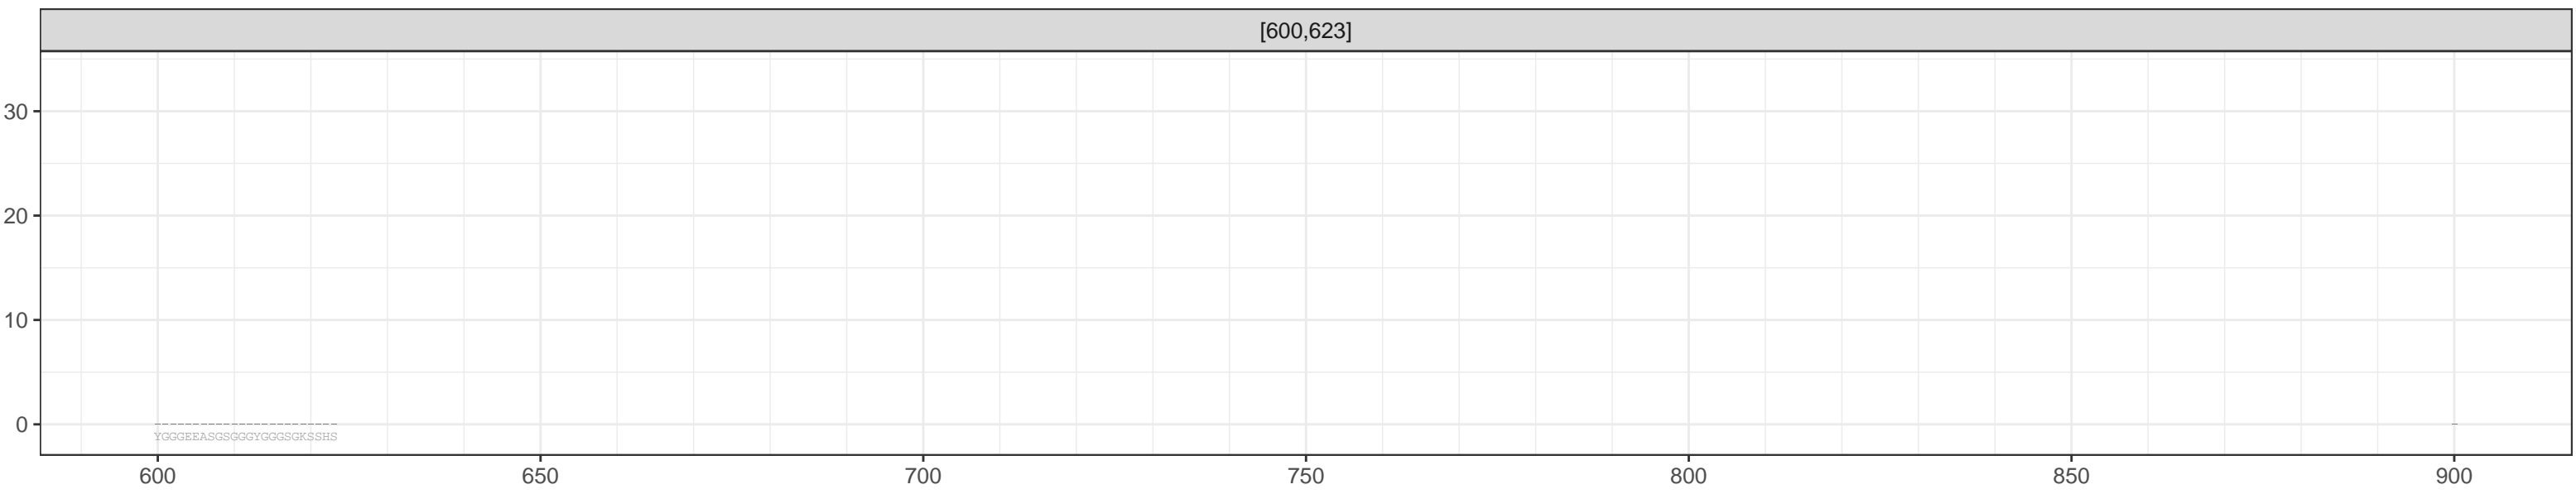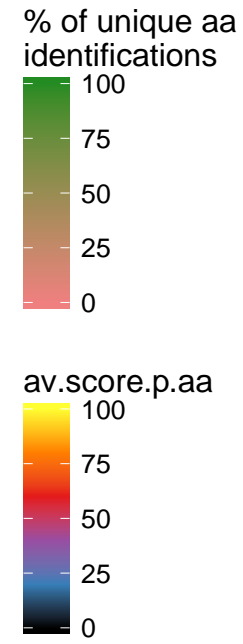

amino acid sequence and position

KRT1 - protein\_id: ###CONTAMINANT###P04264 - sequence coverage: 24.2 % - total score: 4534

180222\_band02\_R1

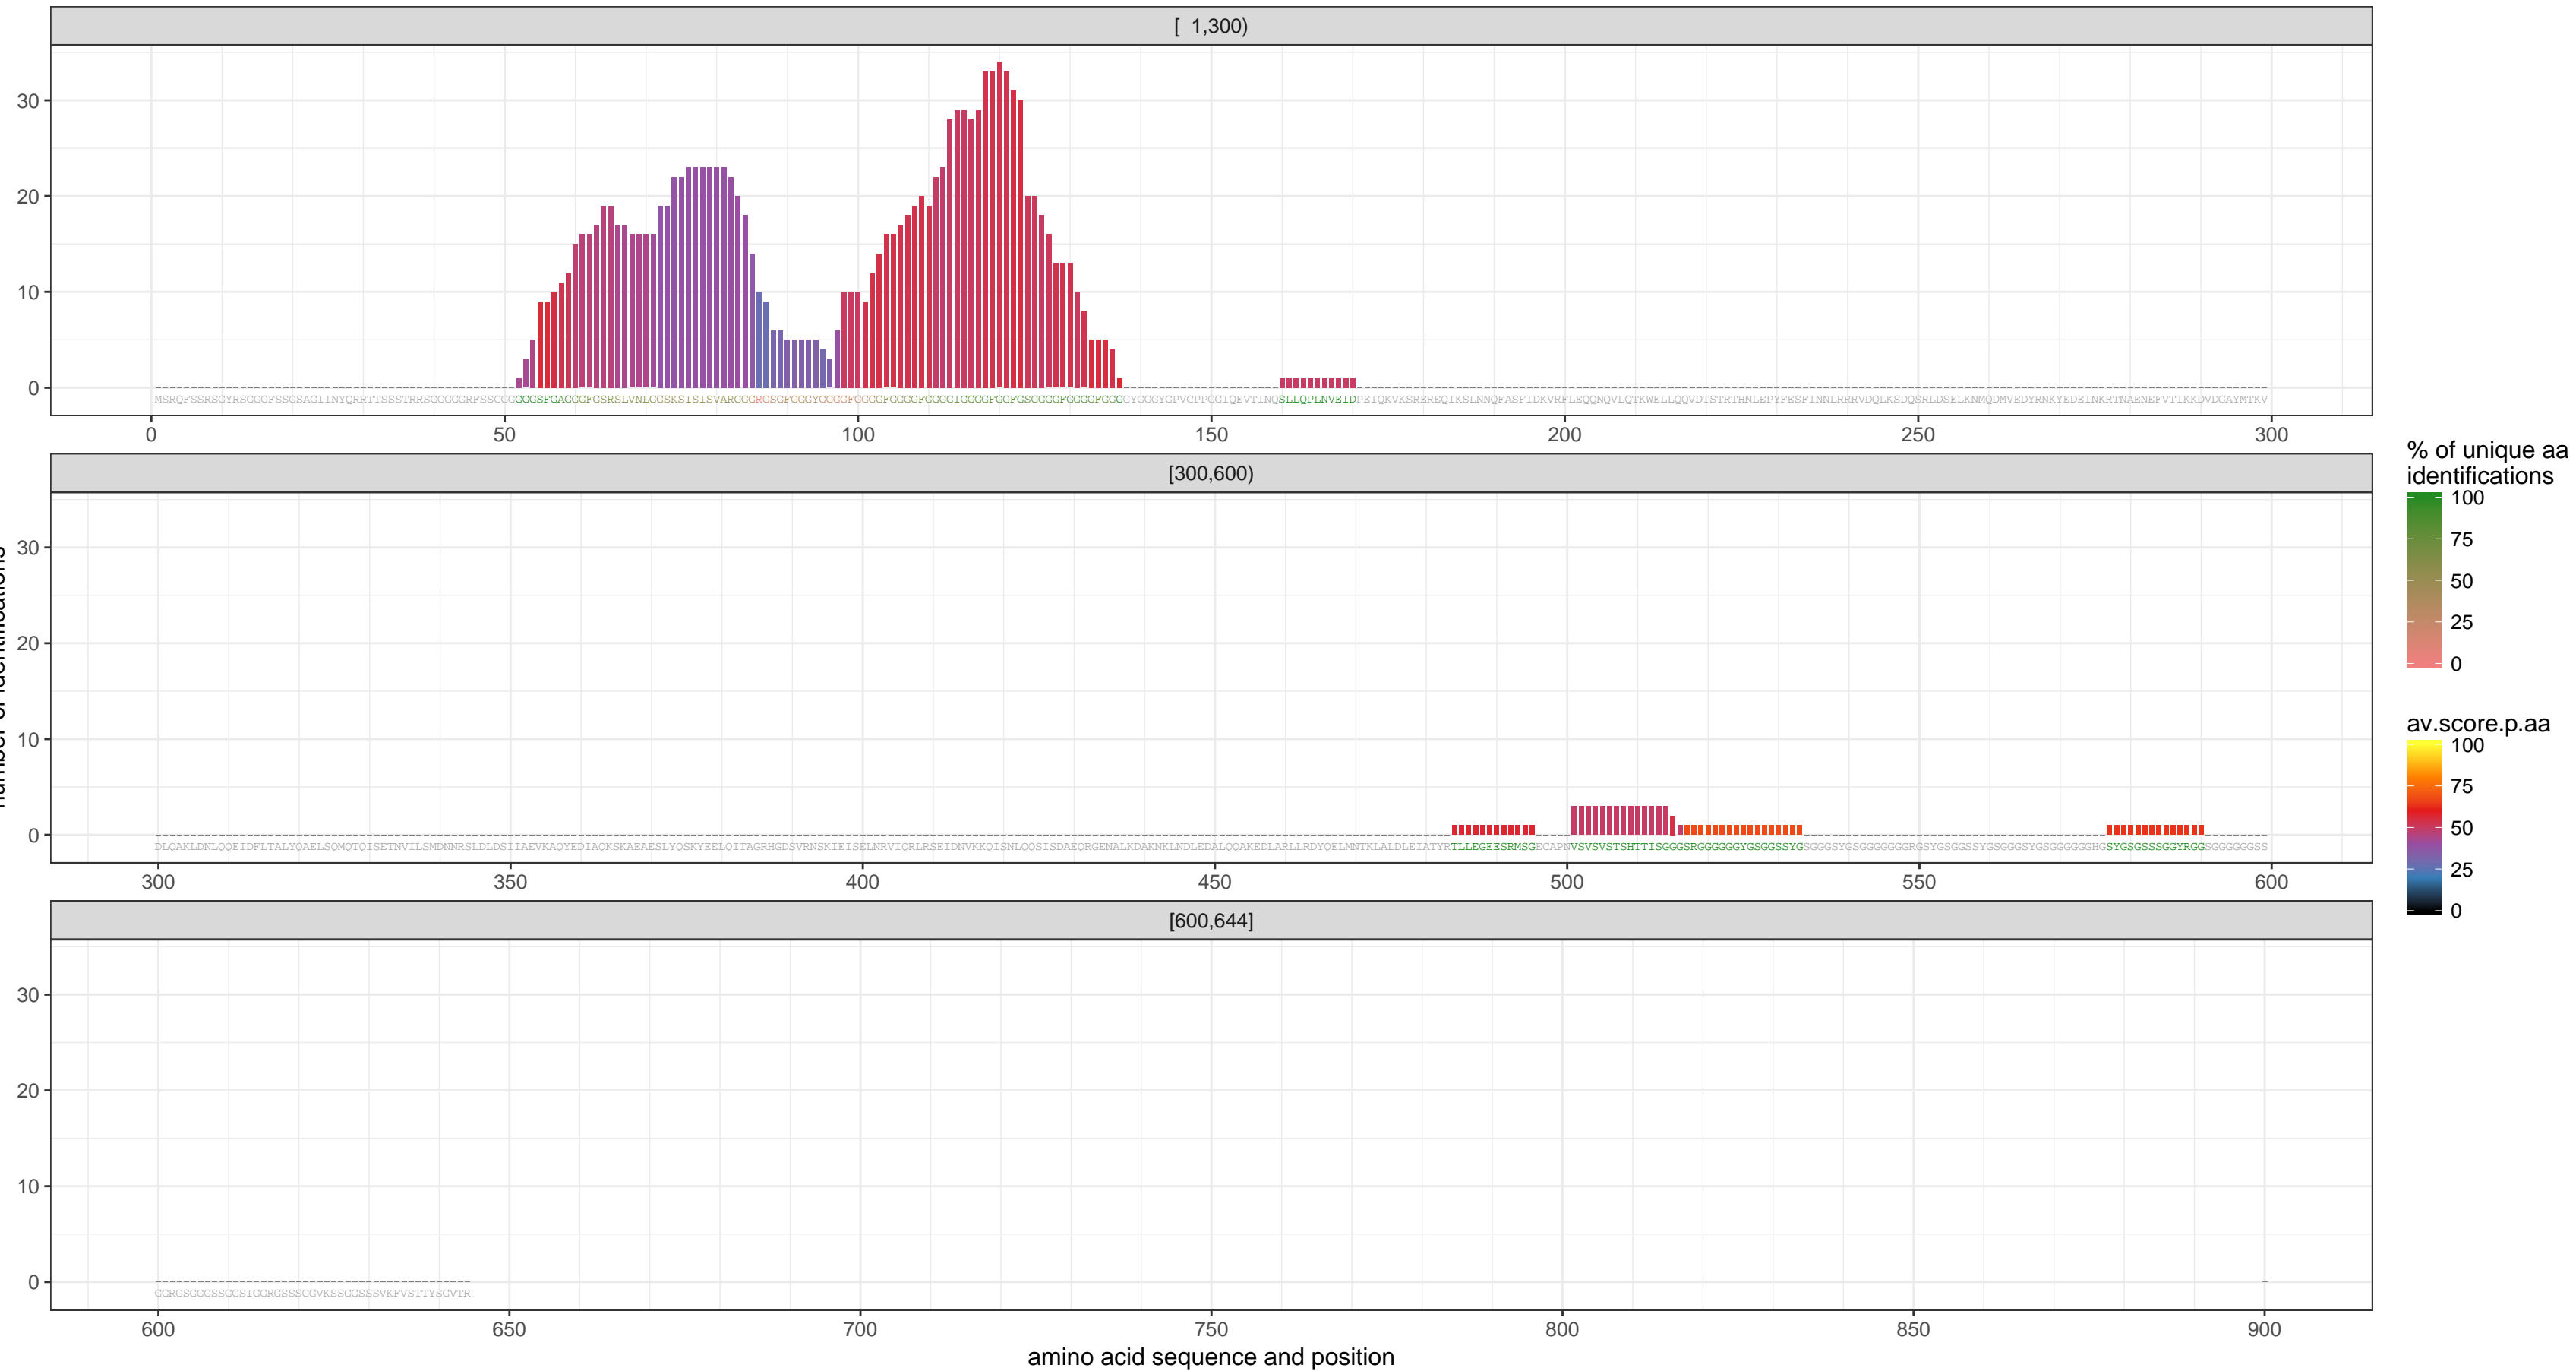

180222\_band02\_R1

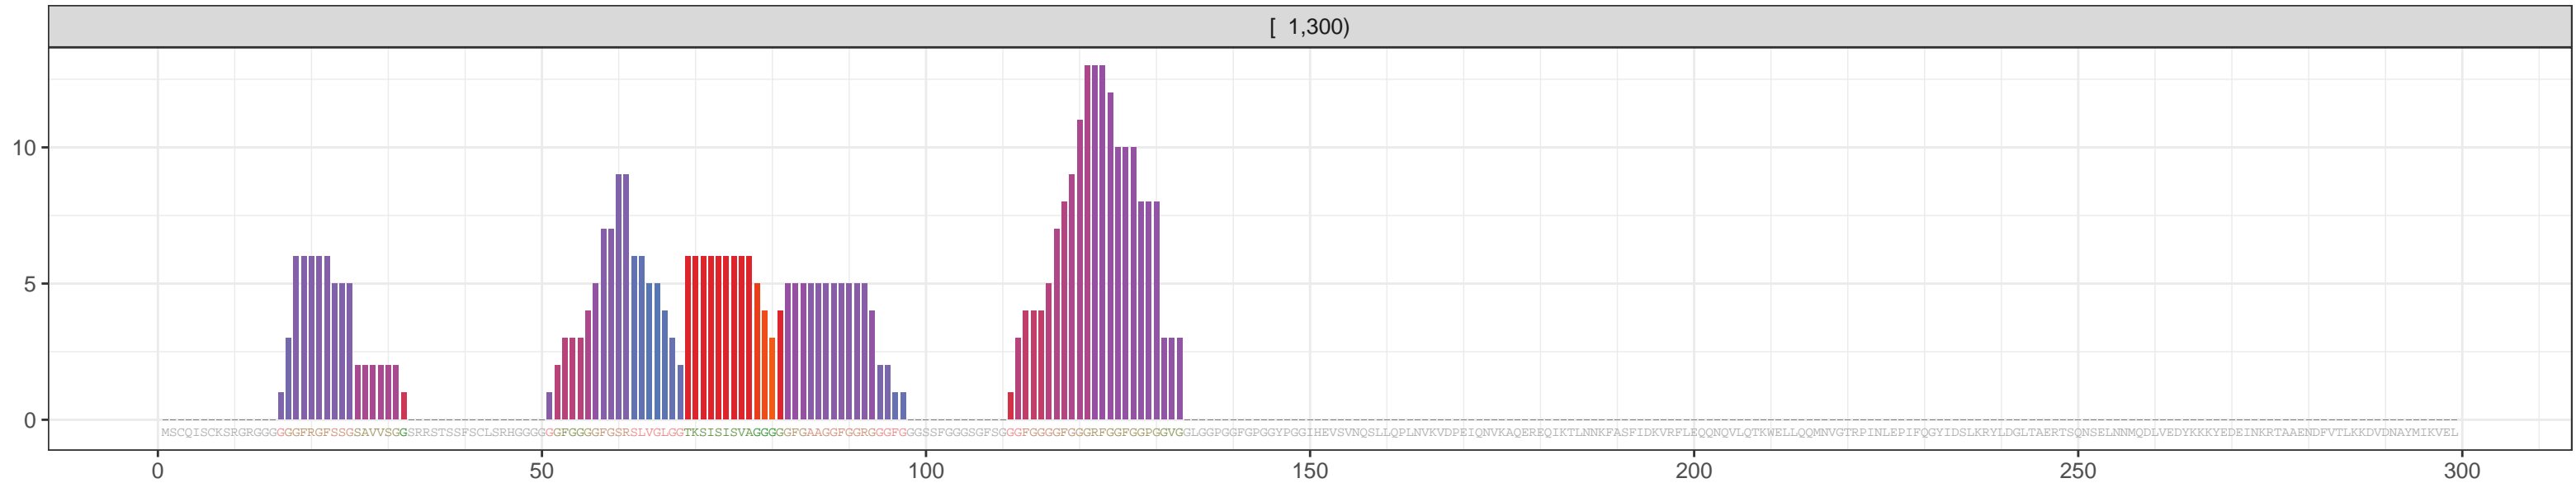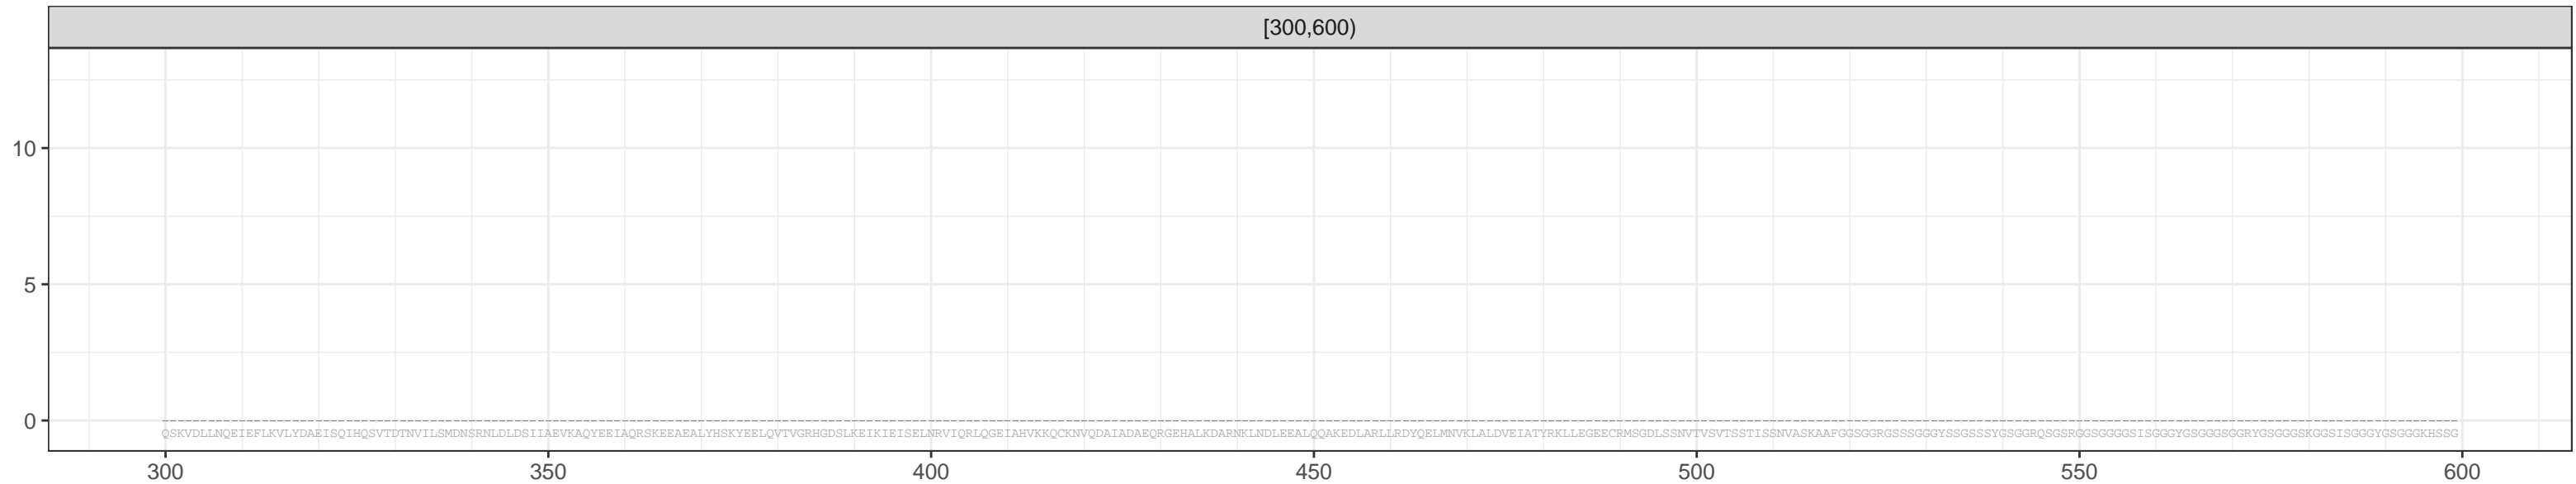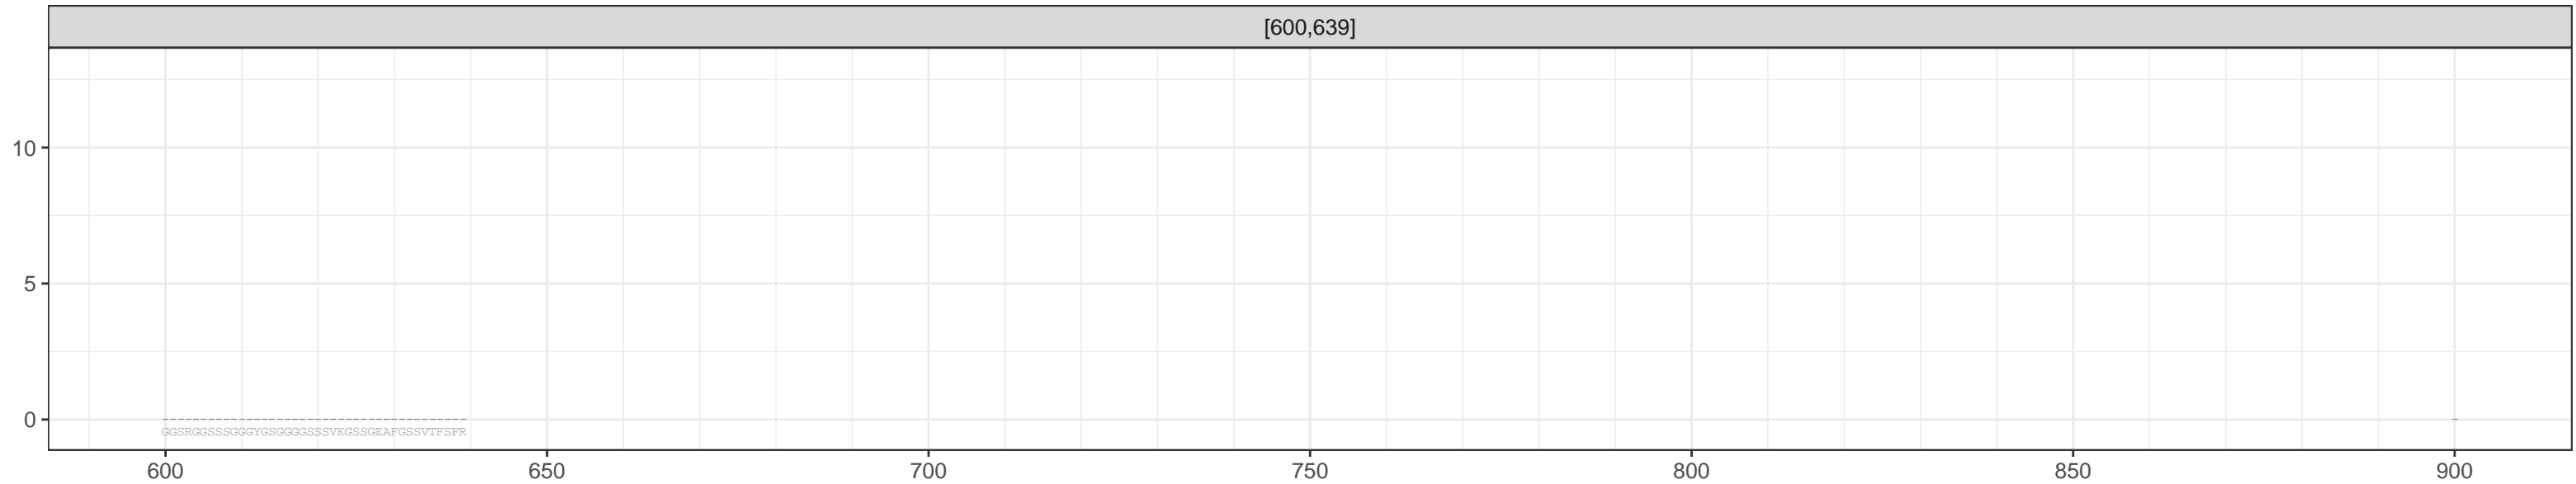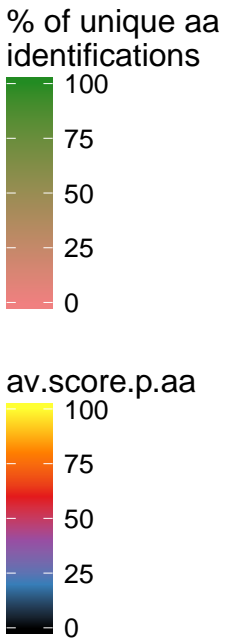

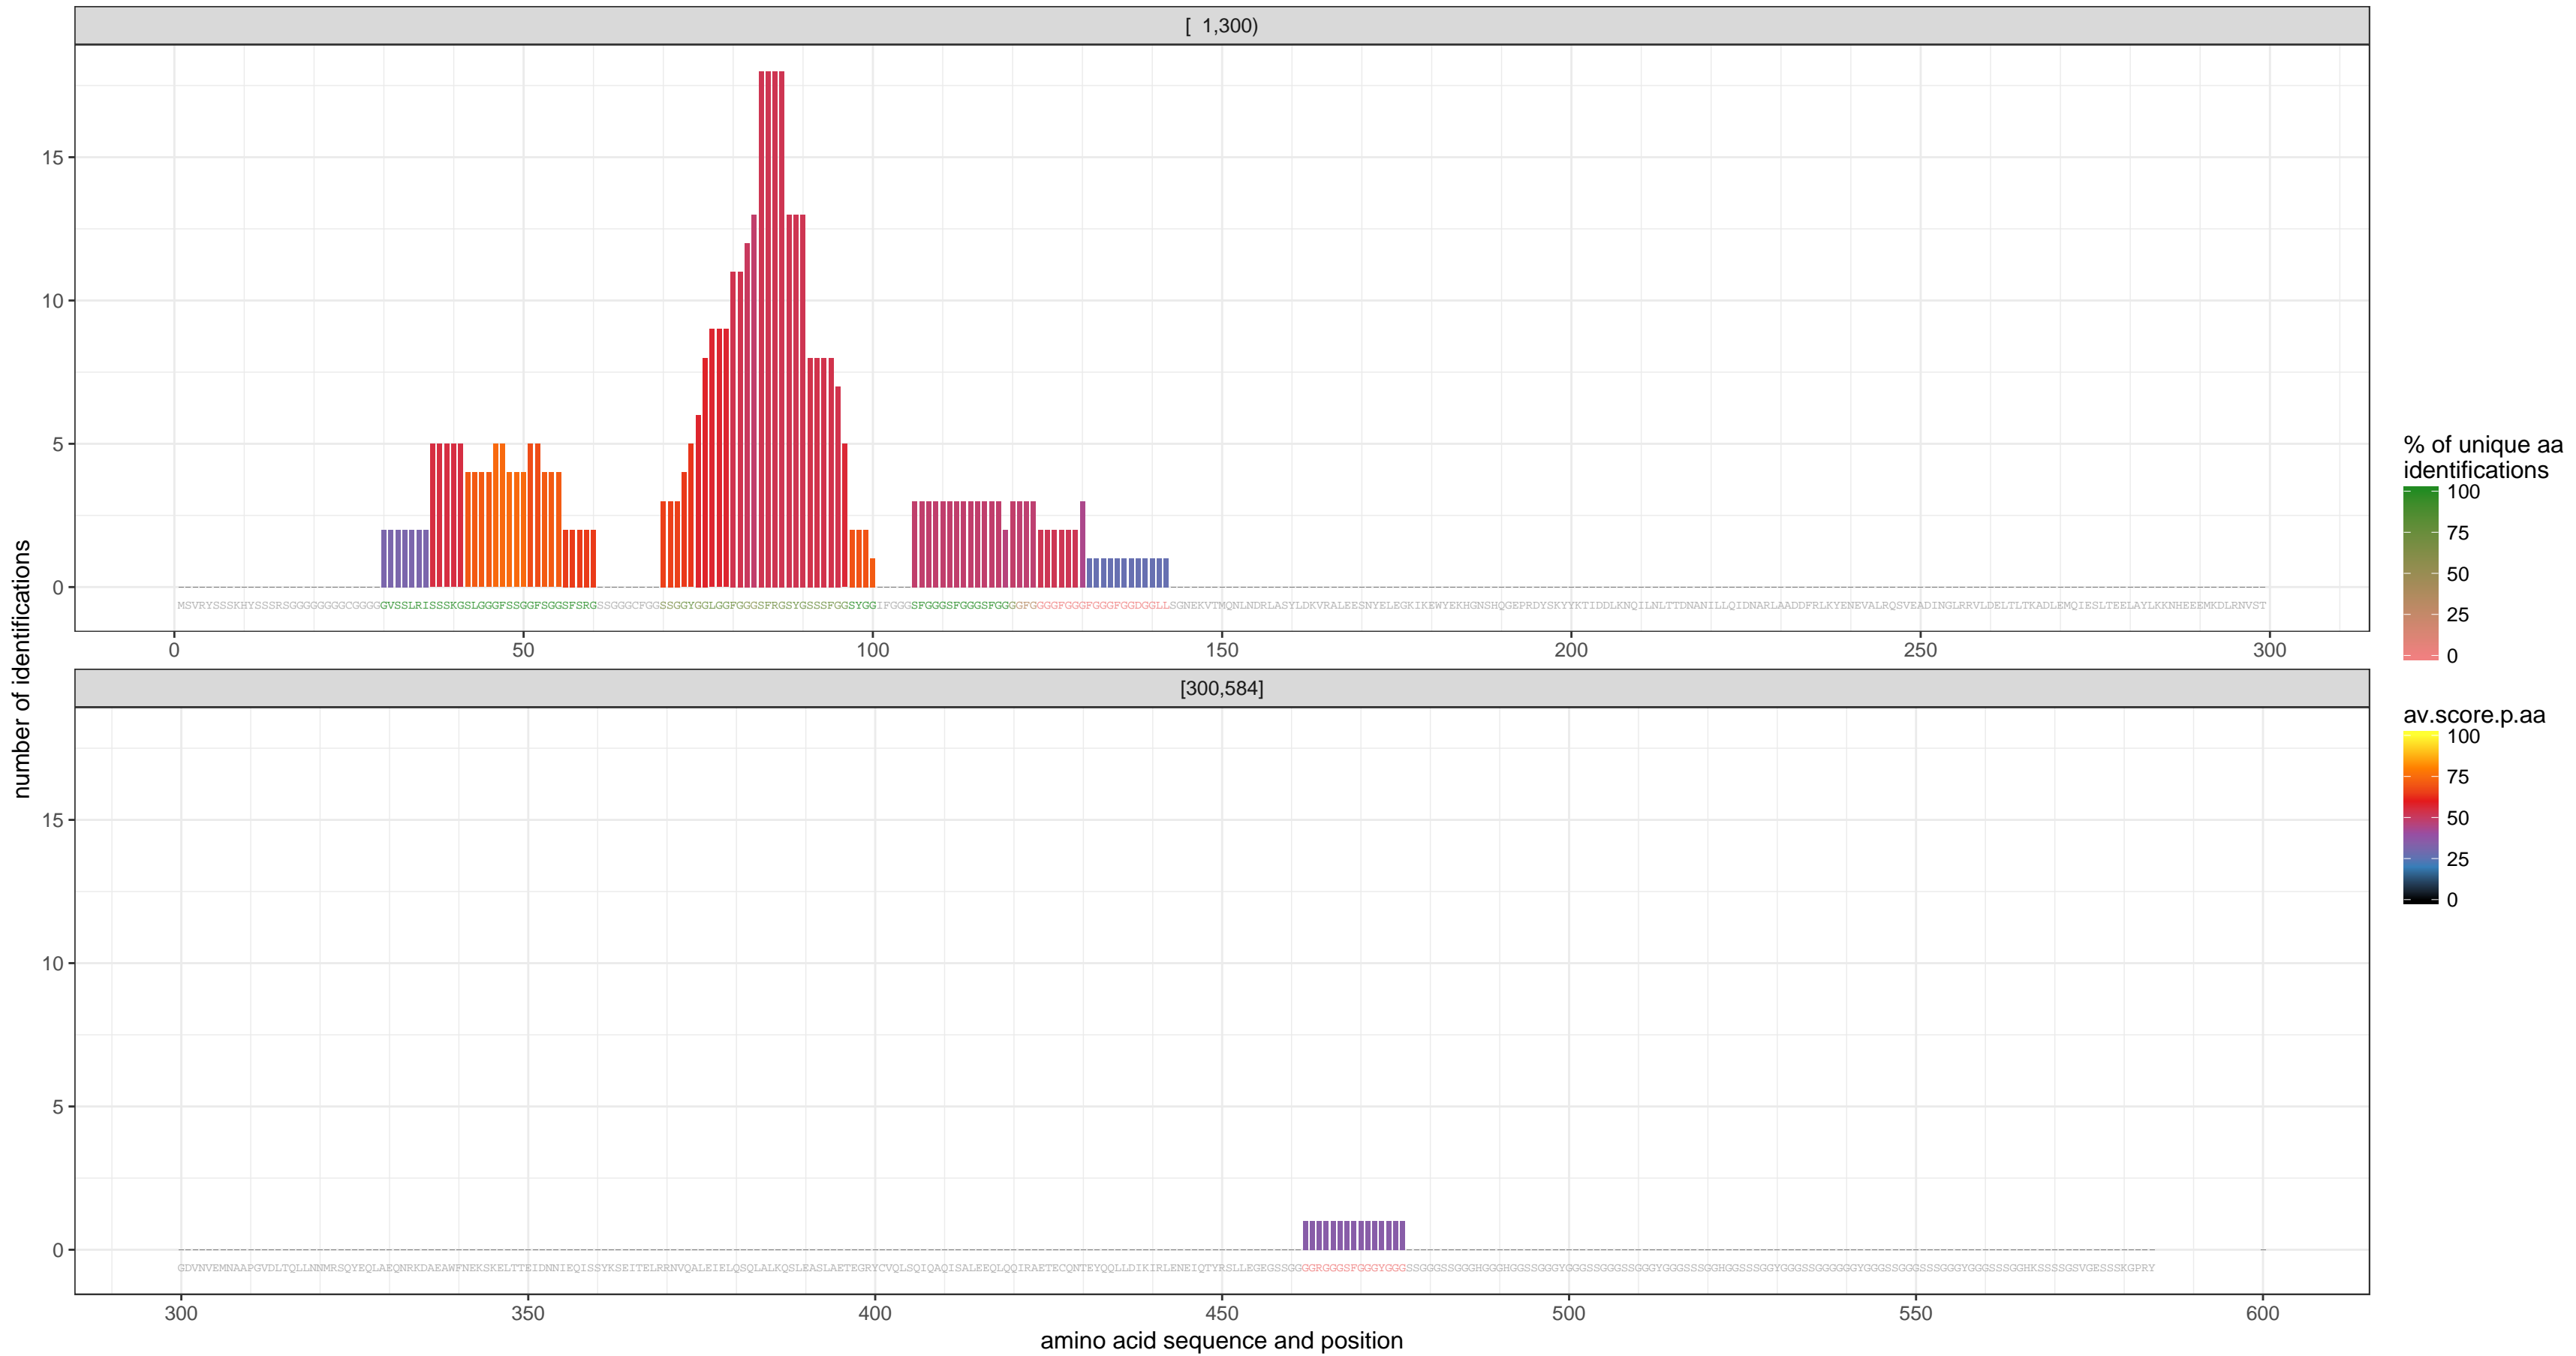

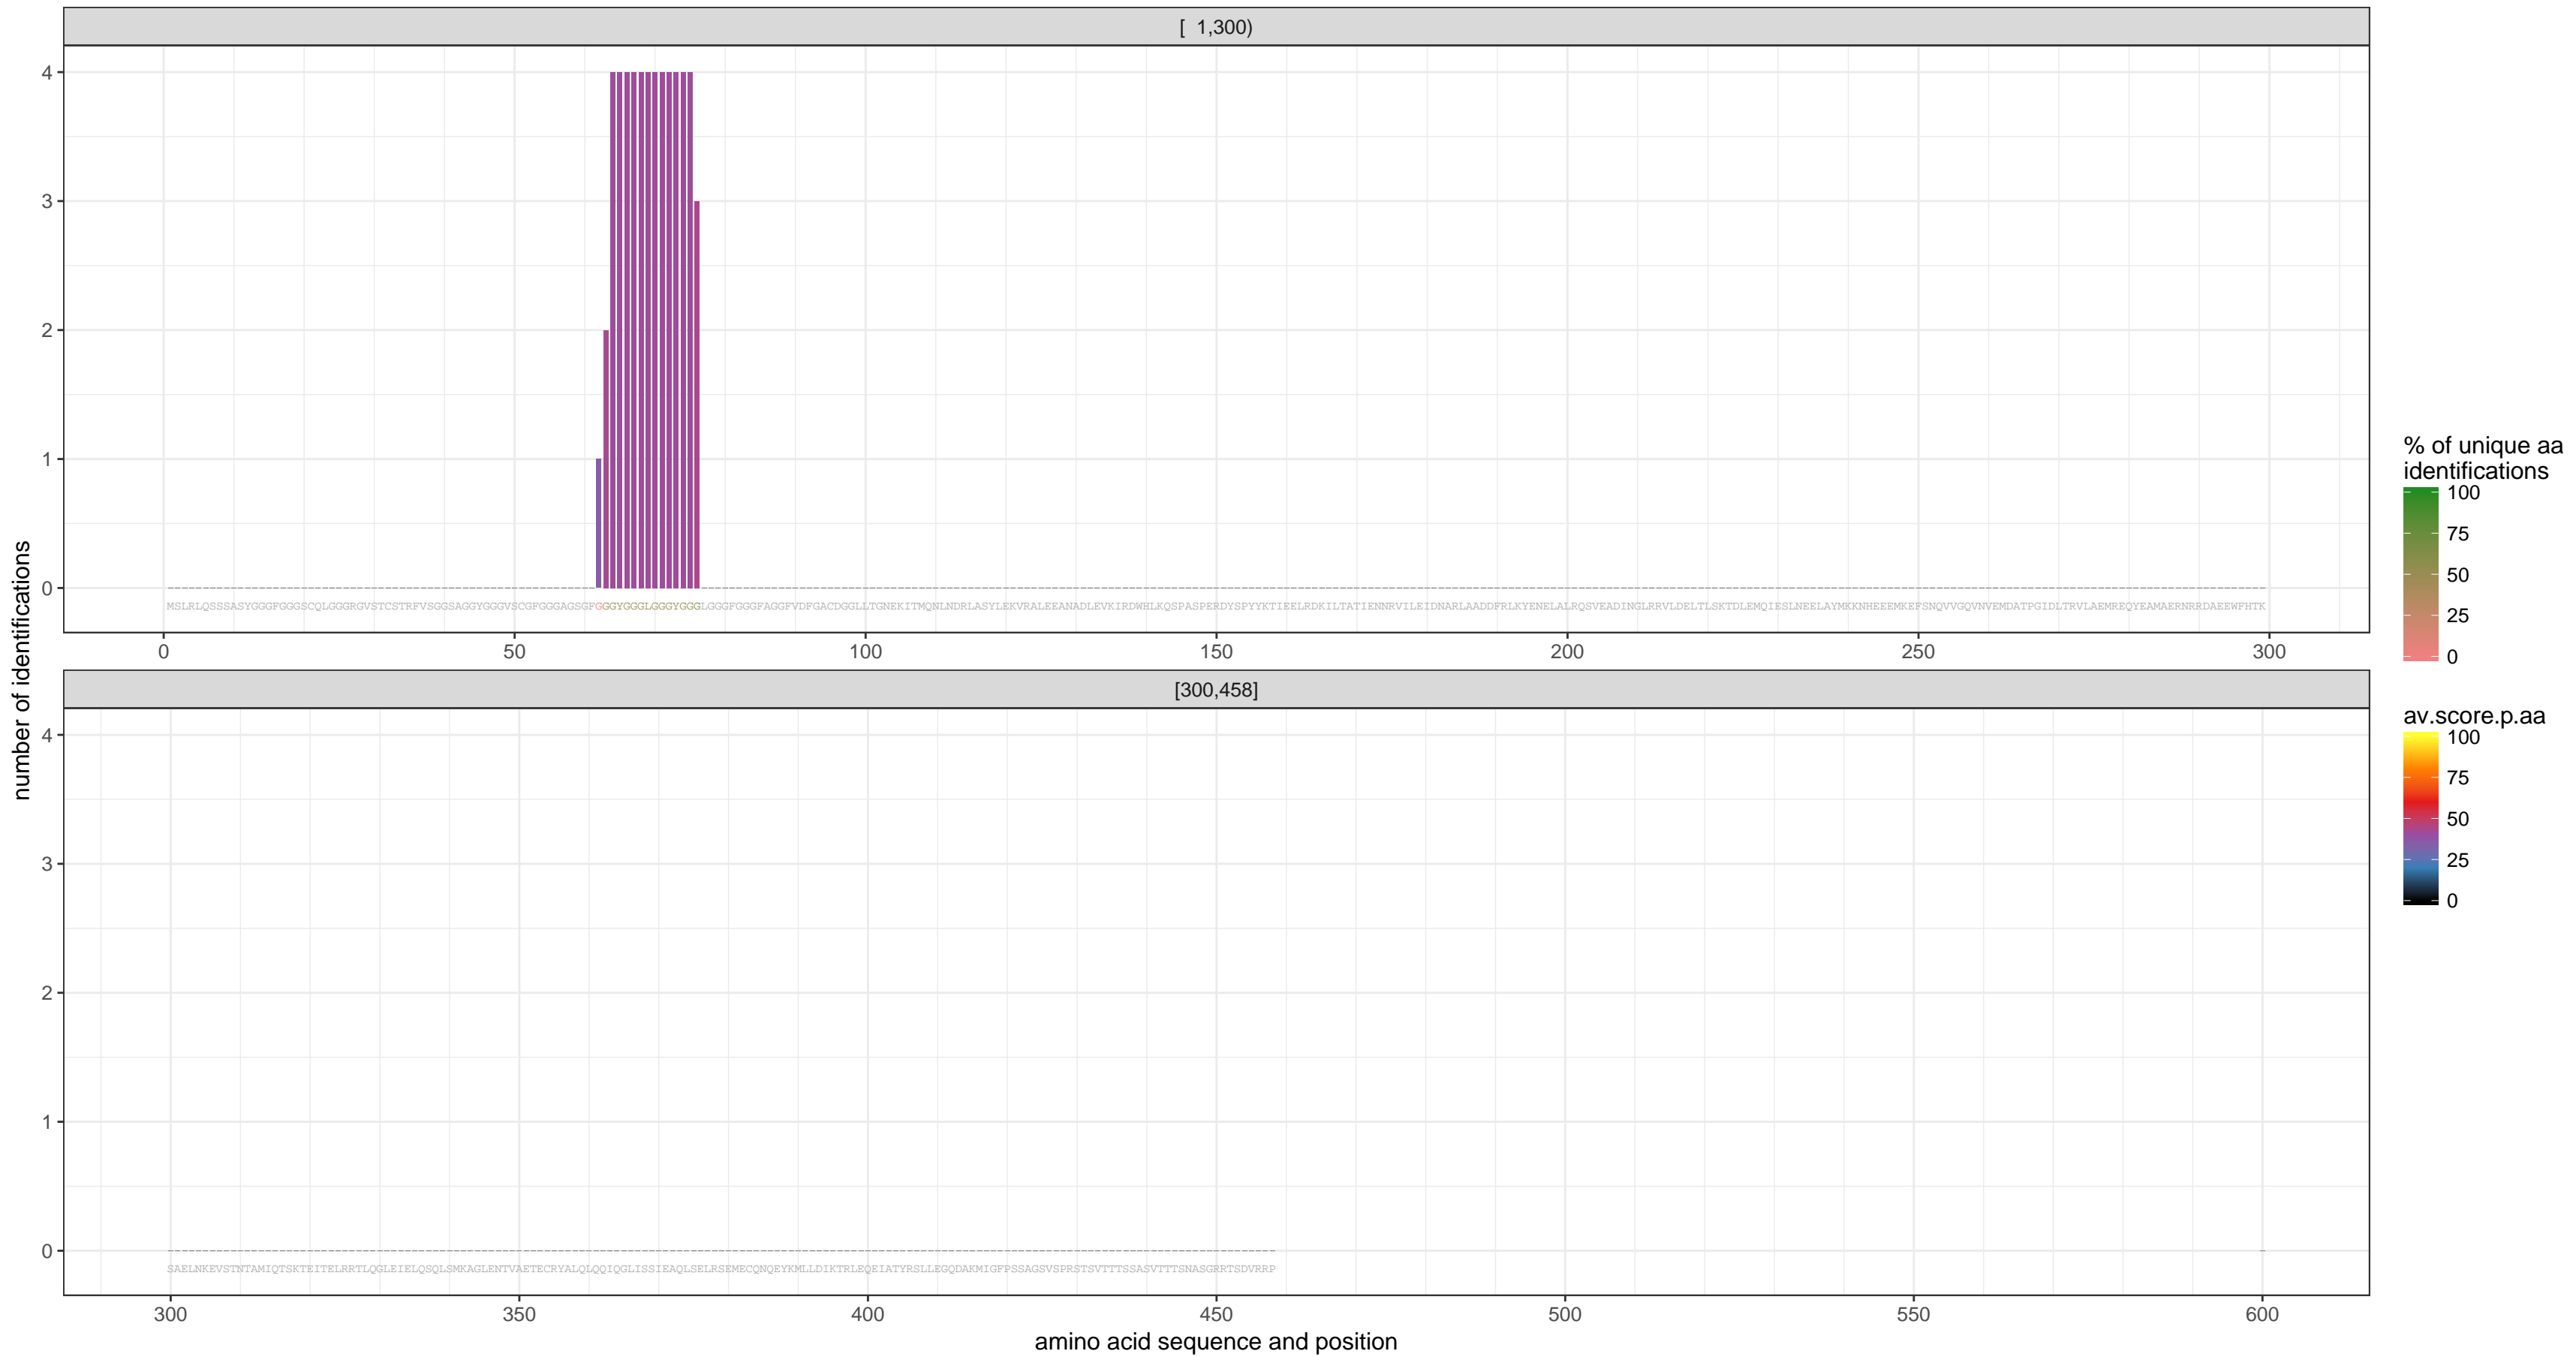

180222\_band02\_R1

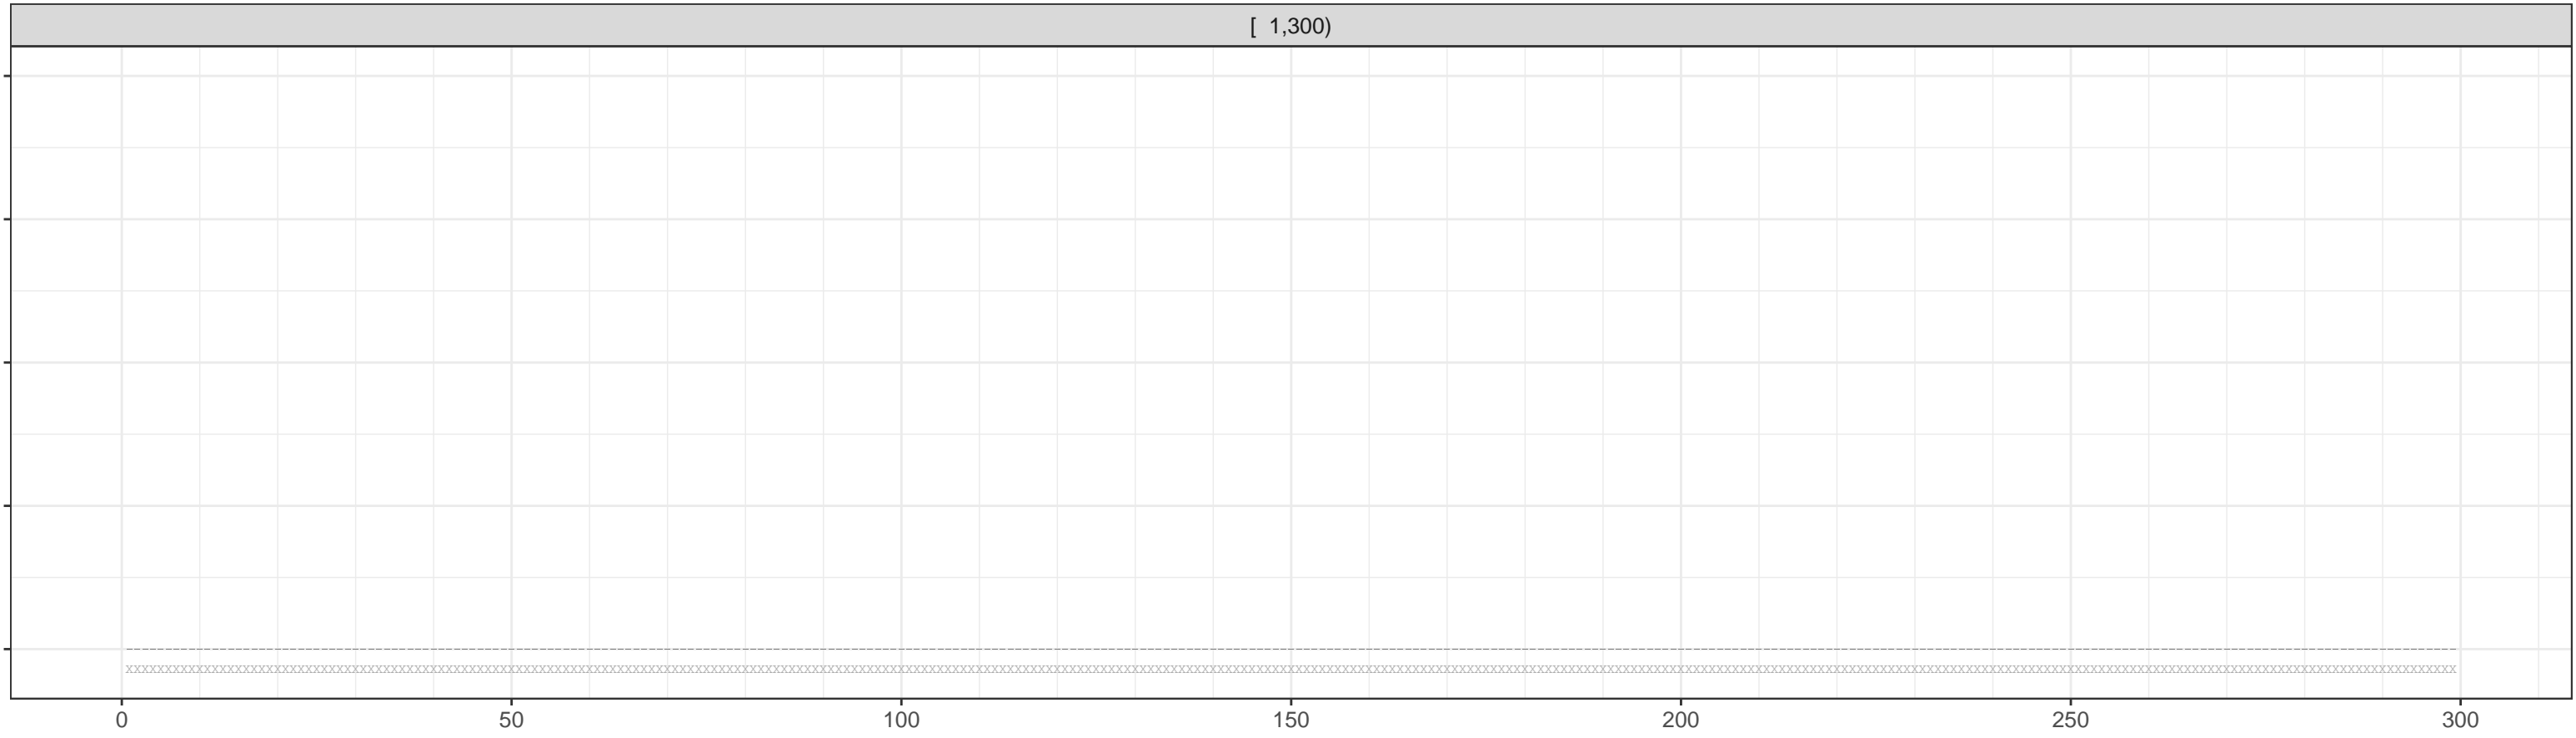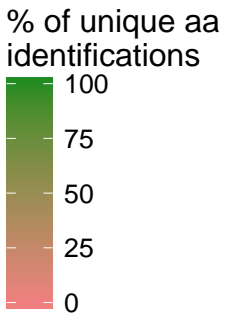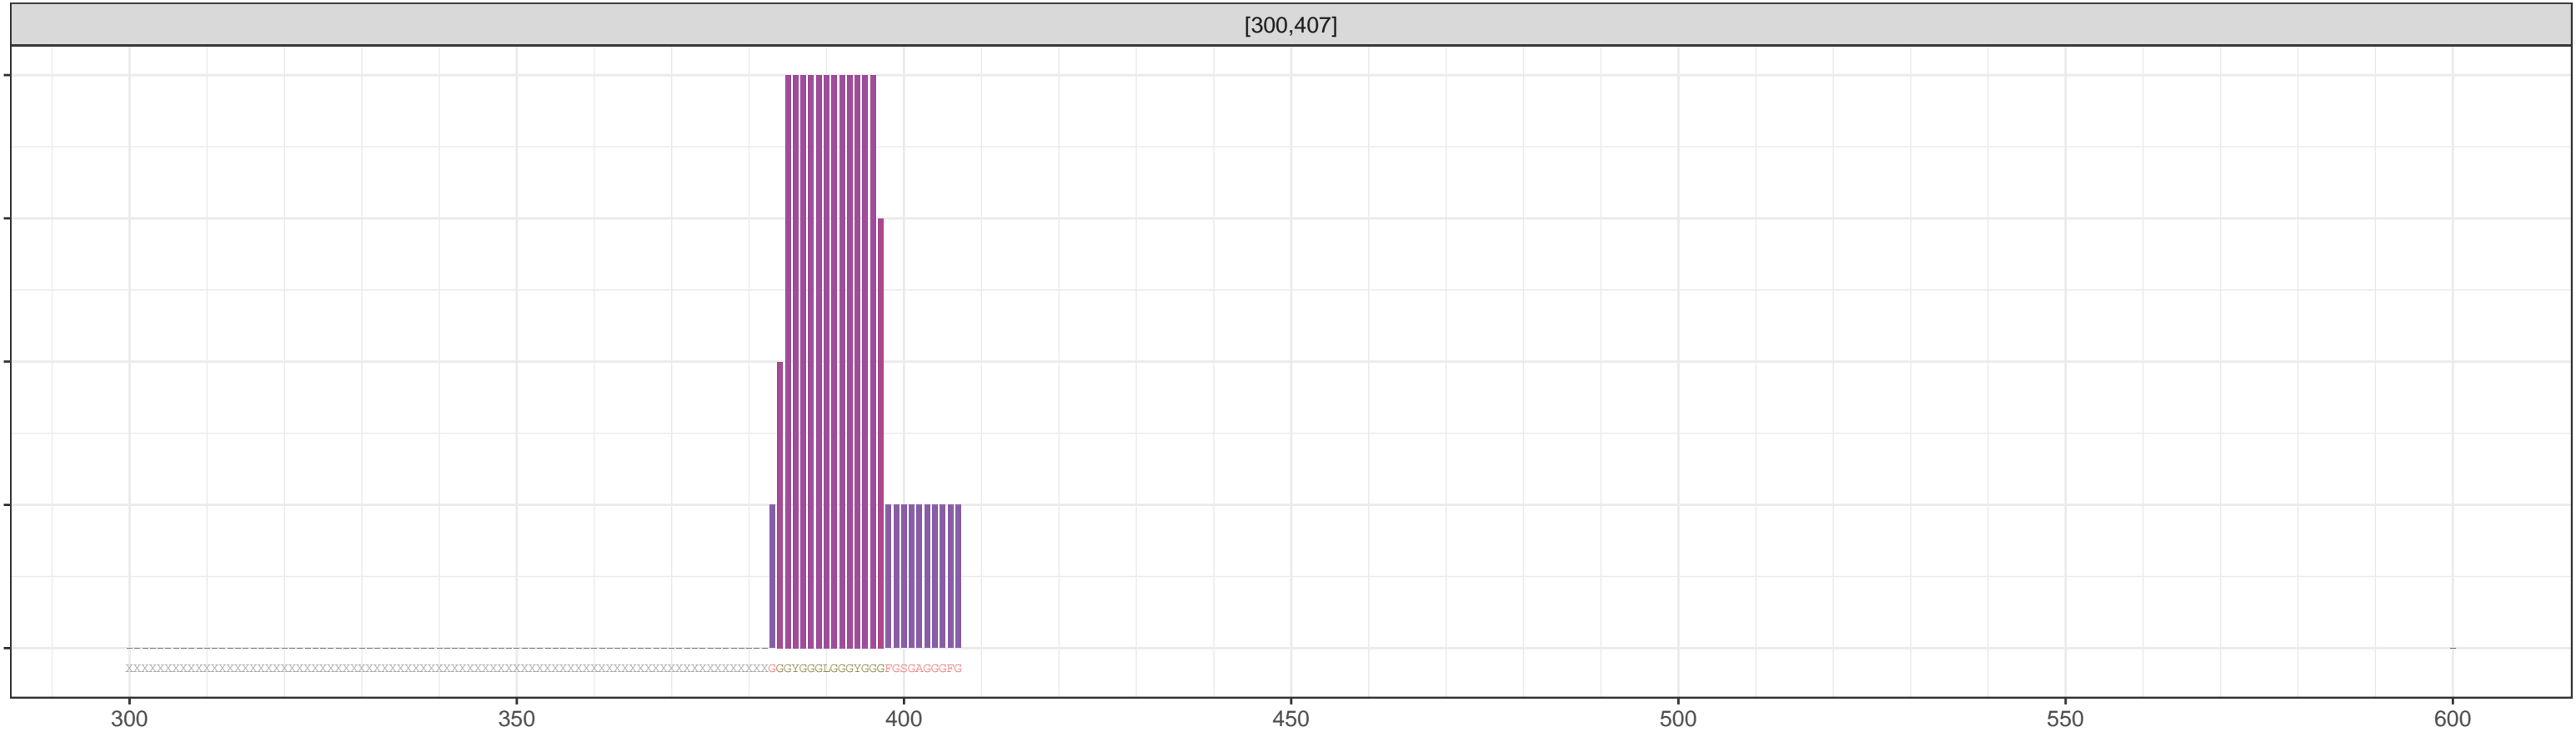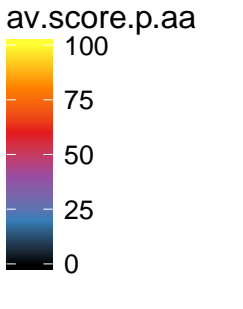

– protein\_id: ###REV#####CONTAMINANT###P13645 – sequence coverage: 2.8 % – total score: 220

180222\_band02\_R1

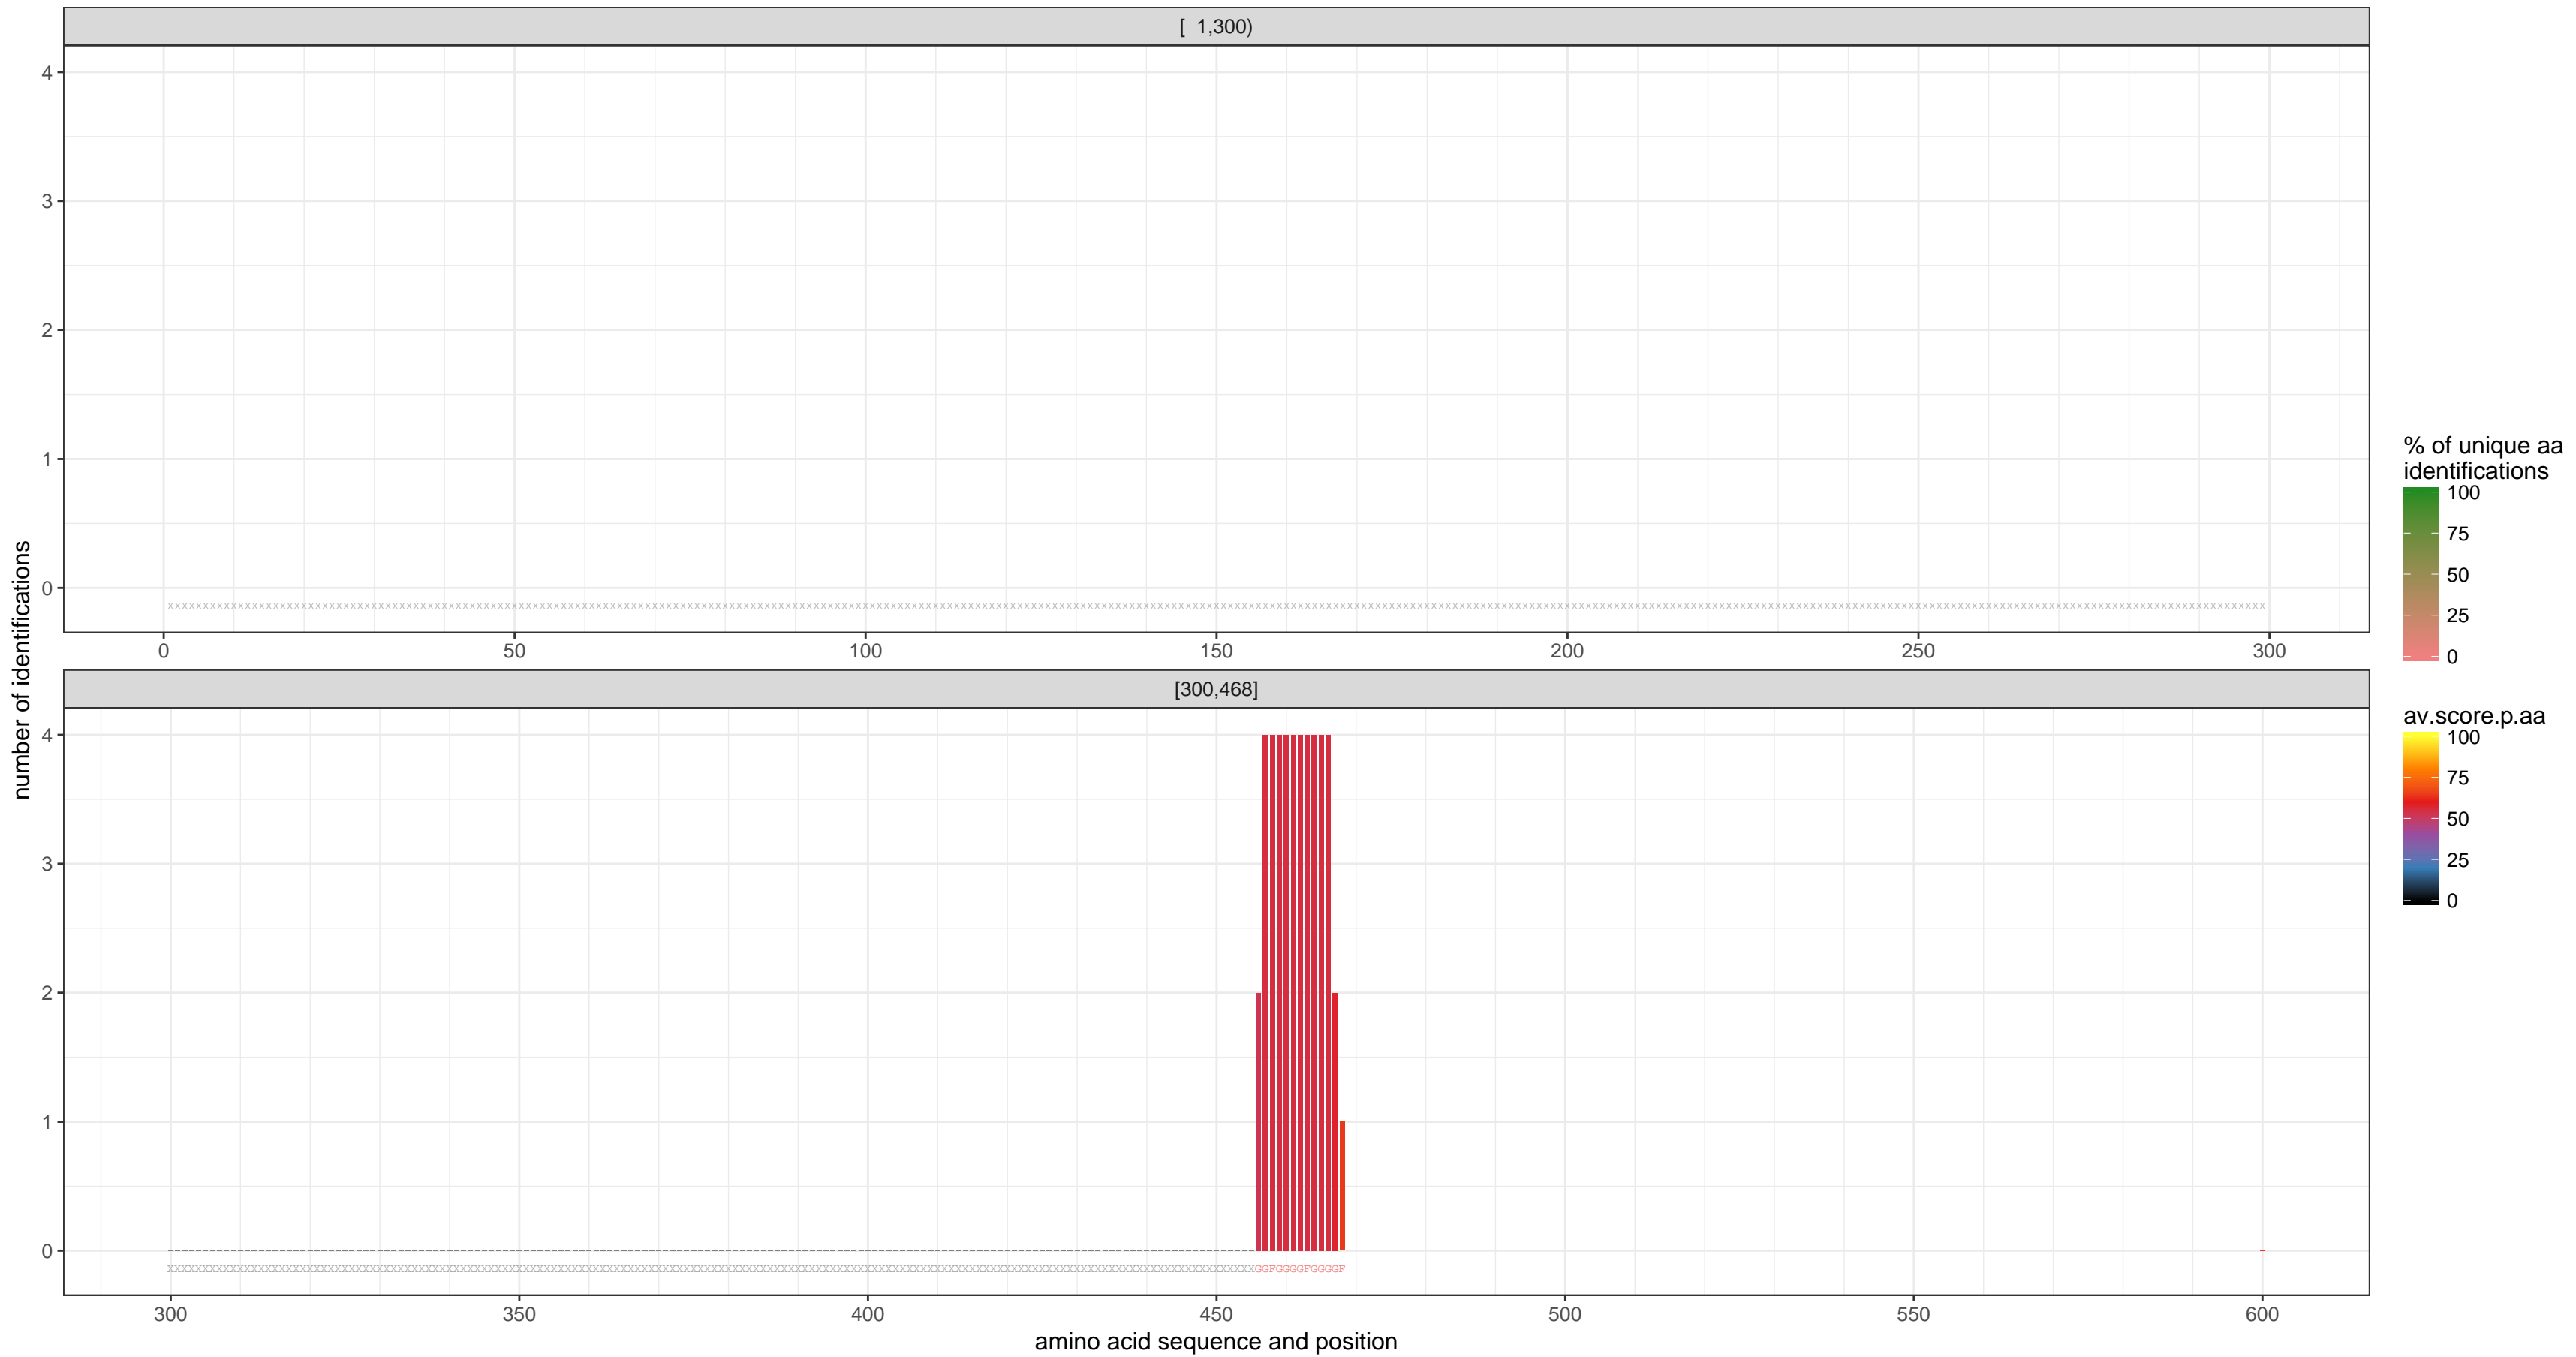



- protein\_id: ###REV#####CONTAMINANT###P35908 - sequence coverage: 5.7 % - total score: 183

180222\_band02\_R1

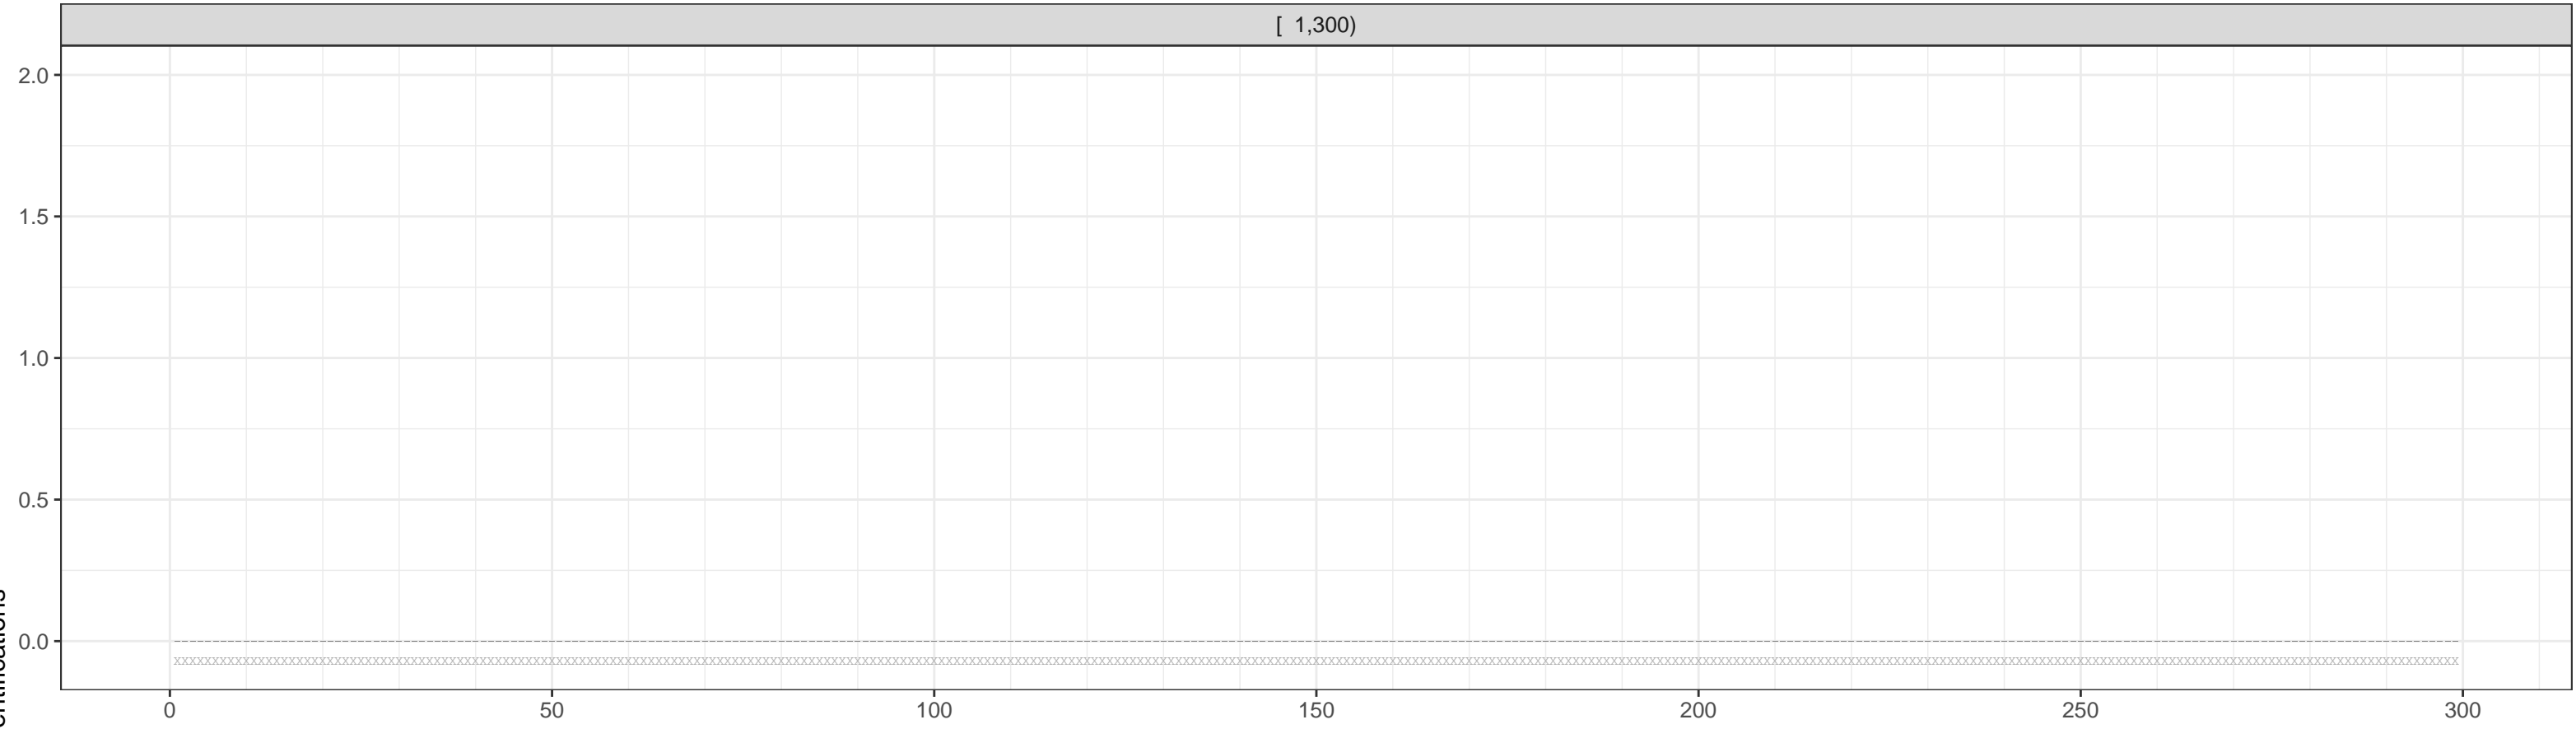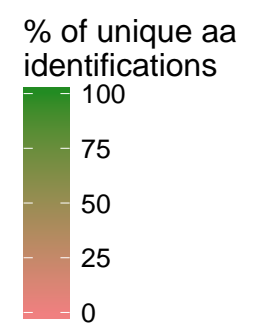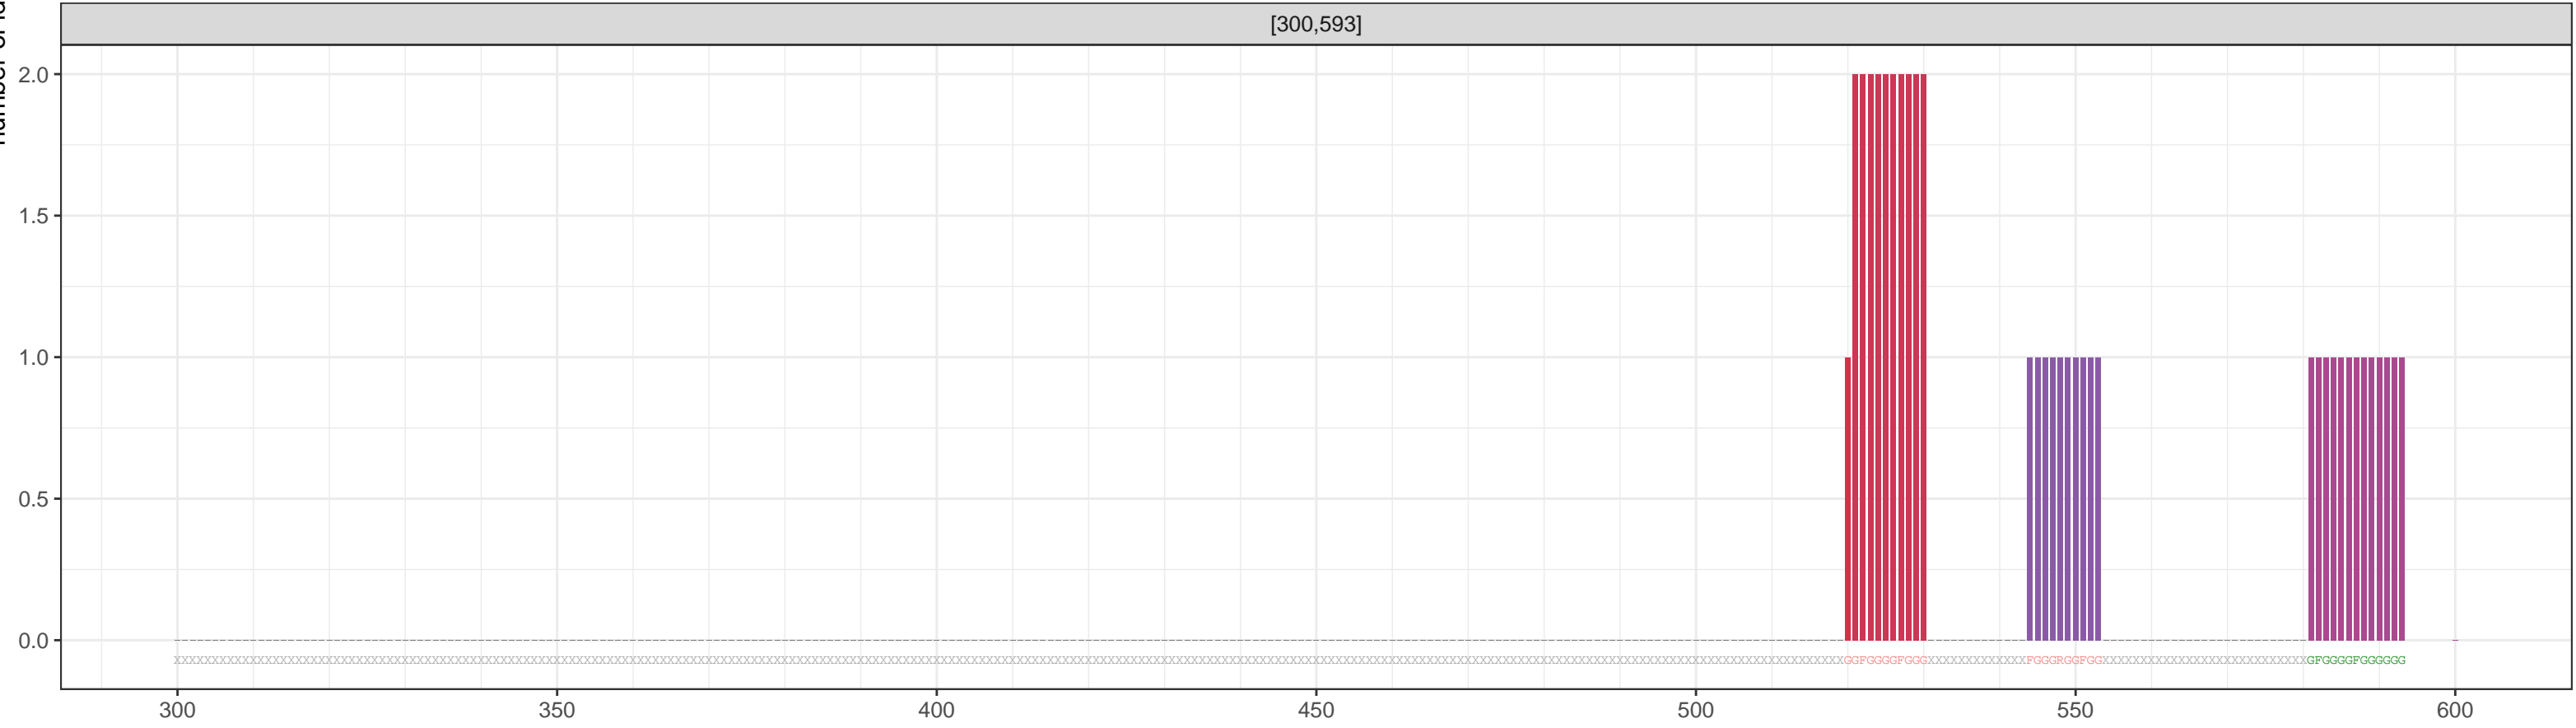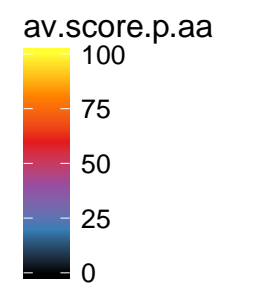

Supplement: 41467_2024_49488_MOESM11_ESM.pdf [file 41467_2024_49488_MOESM11_ESM.pdf]
